# Supplementary material for: Photo-induced Doping in GaN Epilayers with Graphene Quantum Dots
Source: PubMed Central journal article supplement (PMC4796870; doi:10.1038/srep23260), 2016-03-18
Supplement: srep23260-s1.pdf [file srep23260-s1.pdf]

# Photoinduced Doping in GaN Epilayers with Graphene Quantum Dots

T. N. Lin<sup>1</sup>, M. R. Inciong<sup>1</sup>, S. R. M. S. Santiago<sup>1</sup>, T. W. Yeh<sup>1</sup>, W. Y. Yang<sup>1</sup>, C. T.  
Yuan<sup>1\*</sup>, J. L. Shen<sup>1\*</sup>, H. C. Kuo<sup>2</sup> & C. H. Chiu<sup>3</sup>

<sup>1</sup>Department of Physics and Center for Nanotechnology, Chung Yuan Christian University, Chung-Li, Taiwan

<sup>2</sup>Department of Photonic and Institute of Electro-Optical Engineering, National Chiao Tung University, Hsin-Chu, Taiwan

<sup>3</sup> Department of Electronic Engineering, Chung Yuan Christian University, Chung-Li, Taiwan

\*Corresponding author: [ctyuan@cycu.edu.tw](mailto:ctyuan@cycu.edu.tw) (Chi-Tsu Yuan), [jlshen@cycu.edu.tw](mailto:jlshen@cycu.edu.tw) (Ji-Lin Shen)

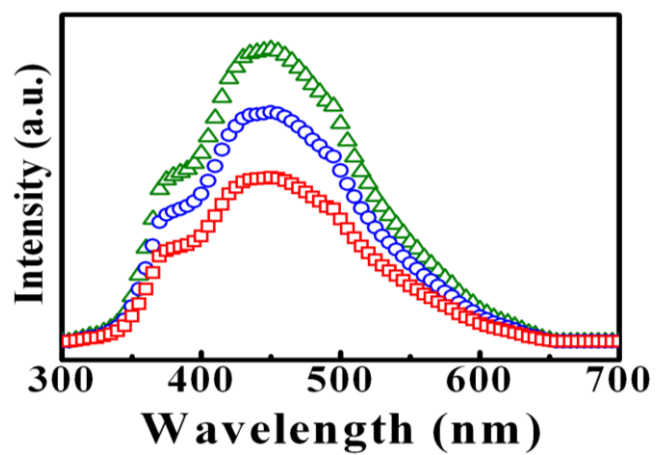

**Figure S1.** The photoluminescence spectra of graphene quantum dots (GQDs) with different GQD concentrations: 0.3 (open squares), 1.5 (open circles), and 2.4 mg/ml (open triangles).

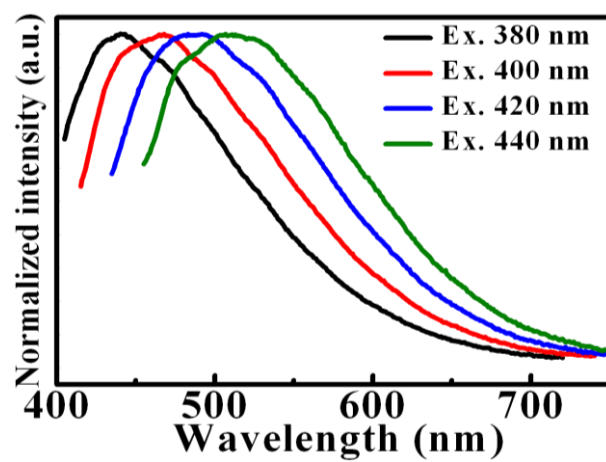

**Figure S2.** Photoluminescence spectra of GQDs with varying excitation wavelengths.

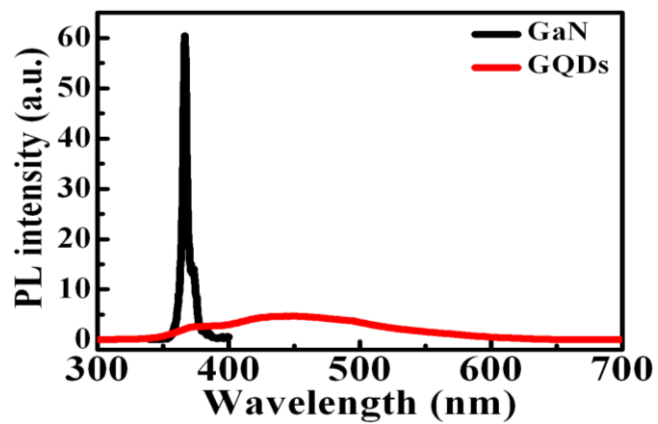

**Figure S3. Photoluminescence spectra of GaN and GQDs when excited at a wavelength of 260 nm.**

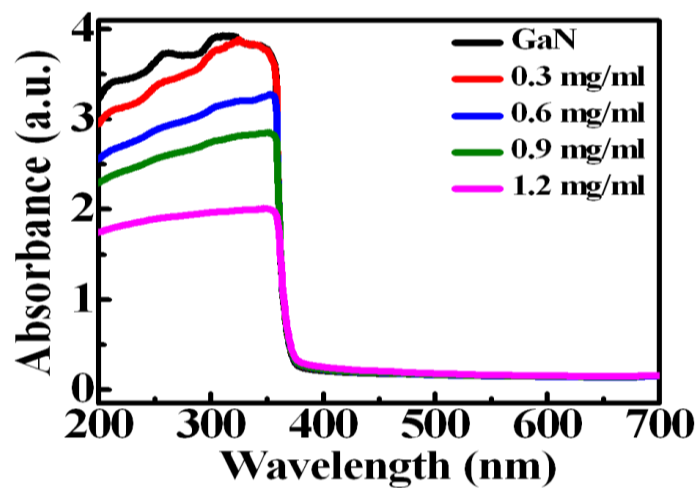

Figure S4. Absorption spectra of GaN with different GQD concentrations.
